# Supplementary material
Source: publisher figshare collection journal article supplement (https://frontiersin.figshare.com/ndownloader/files/28758840)
Supplement: Supplementary file 1 [file 28758840]

## Supplementary Material

**Table S1. Summary of all 63 peer-reviewed publications describing the use of canopy camera-traps to study arboreal mammals. Results obtained via Web of Knowledge in February 2021 using the search terms “camera trap” AND “arboreal”, and, separately, “camera trap” AND “canopy”, with time-period set to all years. A summary of our study appears on the top row for comparison. Tildes (~) denote where number of camera-trap nights (CTN) was not explicitly stated, but could be estimated from the number of camera-traps and sampling period reported in the study.**

| Reference               | Main focus                                                                                                                                     | Country           | Canopy camera-trap number (n), height range (h) & bait/lure use | Other sampling                | Forest type                        | No. CTN Canopy | No. CTN Terrestrial | No. mammal species detected (multi-species studies only)                    |
|-------------------------|------------------------------------------------------------------------------------------------------------------------------------------------|-------------------|-----------------------------------------------------------------|-------------------------------|------------------------------------|----------------|---------------------|-----------------------------------------------------------------------------|
| <i>This study</i>       | <b>Inventory, Method, Disturbance effects</b><br>Canopy & terrestrial camera traps to inventory mammal communities of unlogged & logged forest | Malaysia (Borneo) | n = 69<br>h = 9.8-52.3 m                                        | Terrestrial cameras<br>n = 49 | Tropical lowland-hill rainforest   | 10565          | 6661                | Total = 57<br>Canopy only = 18<br>Terrestrial only = 30<br>Both heights = 9 |
| 1 Azcarraga et al. 2020 | <b>Activity</b><br>Activity patterns of arboreal mammals                                                                                       | Mexico            | n = 9<br>h = 8-12 m                                             | n/a                           | Semi-deciduous tropical rainforest | 2664           | n/a                 | Total = 12                                                                  |
| 2 Chan et al. 2020      | <b>Bridge use</b><br>Canopy bridge use by critically endangered Hainan gibbon <i>Nomascus hainanus</i>                                         | China             | n = 1<br>h = 7-10 m                                             | n/a                           | Seasonal tropical rainforest       | ~1170          | n/a                 | n/a                                                                         |
| 3 Debruille et al. 2020 | <b>Species presence</b><br>Canopy cameras to improve detection of binturongs ( <i>Arctictis binturong</i> )                                    | Philippines       | n = 15<br>h = 1.7-18 m                                          | n/a                           | Logged tropical forest             | 2973           | n/a                 | n/a                                                                         |
| 4 Fang et al. 2020      | <b>Species presence</b>                                                                                                                        | China             | n = 30                                                          |                               |                                    | ~5400          | n/a                 |                                                                             |

# Supplementary Material

|   |                           |                                                                                                                                         |              |                            |                                                                                  |                                       |          |       |                                                                                                                                                                                         |
|---|---------------------------|-----------------------------------------------------------------------------------------------------------------------------------------|--------------|----------------------------|----------------------------------------------------------------------------------|---------------------------------------|----------|-------|-----------------------------------------------------------------------------------------------------------------------------------------------------------------------------------------|
|   |                           | Canopy cameras confirm range extension for critically endangered western black crested gibbon <i>Nomascus concolor</i>                  |              | h = 8-15 m                 | Line transects, interviews, call monitoring                                      | Temperate montane forest              |          |       | Presence suspected from call recordings & interviews, identity confirmed by cameras. Species not detected by transects.                                                                 |
| 5 | Hongo et al. 2020         | <b>Inventory</b><br>Using multi-layer (terrestrial, <15 m & >15 m) camera trapping to inventory mammals. Medium and large mammals only. | Cameroon     | n = 150<br>h = 4-24 m      | Terrestrial cameras<br>n = 88                                                    | Evergreen & semi-deciduous rainforest | 5404     | 2901  | Total = 40<br>Canopy cameras only = 8*<br>*including 4 previously unknown from area<br>Terrestrial cameras only = 22<br>Both heights = 10                                               |
| 6 | Laughlin et al. 2020      | <b>Behaviour</b><br>Seasonal behaviour of white-footed mouse, <i>Peromyscus leucopus</i> & deer mouse, <i>P. maniculatus</i>            | USA          | n not stated<br>h = 8-24 m | Terrestrial live trapping to mark species                                        | Temperate - pine                      | 8491     | n/a   | n/a                                                                                                                                                                                     |
| 7 | Linden et al. 2020        | <b>Bridge use</b><br>Canopy bridge use by samango monkey <i>Cercopithecus albogularis</i>                                               | South Africa | n = 10<br>h = 3-4.5 m      | Behaviour observations                                                           | Disturbed evergreen forest / road     | 480      | n/a   | n/a                                                                                                                                                                                     |
| 8 | Linnell & Lesmeister 2020 | <b>Behaviour (multi-taxa)</b><br>Predator-prey interactions in the canopy (mammals & birds)                                             | USA          | n = 168<br>h = 12-20 m     | n/a                                                                              | Temperate forest                      | ~110,595 | n/a   | 4 mammal species<br>3 bird species                                                                                                                                                      |
| 9 | Moore et al. 2020         | <b>Inventory, Method</b><br>Canopy camera traps, terrestrial camera traps & line transects                                              | Rwanda       | n = 54<br>h = 4-17 m       | Terrestrial cameras<br>n = 50<br><br>Line transects (total distance = 118.23 km) | Montane tropical forest               | ~1620    | ~1560 | Total = 35<br>Canopy cameras only = 7*<br>*including 1 previously unknown from area (see Moore & Niyigaba 2018)<br>Terrestrial cameras only = 15<br>Both heights = 10<br>Transects = 11 |

|    |                          |                                                                                                                                                    |                  |                              |                                                              |                                                 |            |            |                                                                             |
|----|--------------------------|----------------------------------------------------------------------------------------------------------------------------------------------------|------------------|------------------------------|--------------------------------------------------------------|-------------------------------------------------|------------|------------|-----------------------------------------------------------------------------|
| 10 | Nekaris et al. 2020      | <b>Bridge use</b><br>Canopy bridge use between forest fragments                                                                                    | Indonesia (Java) | n = 20<br>h = 1-8 m          | n/a                                                          | Agricultural/<br>montane<br>rainforest          | 2206       | n/a        | 19 species of mammals & birds, number in each category not stated           |
| 11 | Tongkok et al. 2020      | <b>Behaviour</b><br>Arboreal & terrestrial camera traps to monitor frugivory                                                                       | China & Thailand | n not stated<br>h not stated | Terrestrial cameras, number not stated                       | Tropical forest                                 | Not stated | Not stated | Total = 26<br>Number on canopy vs terrestrial cameras not stated            |
| 12 | Balbuena et al. 2019     | <b>Bridge use</b><br>Canopy bridge use over gas pipeline                                                                                           | Peru             | n = 14<br>h = 21.5-32.5 m    | n/a                                                          | Tropical rainforest                             | 4593       | n/a        | Canopy = 16                                                                 |
| 13 | Biro et al. 2019         | <b>Bridge use</b><br>Canopy bridge use by Javan slow loris <i>Nycticebus javanicus</i>                                                             | Indonesia (Java) | n not stated<br>h = 2-8 m    | Observations                                                 | Agroforest in montane rainforest                | 1561       | n/a        | n/a                                                                         |
| 14 | Kaizer 2019 (PhD thesis) | <b>Method</b><br>Canopy camera traps vs line transects for primate monitoring                                                                      | Brazil           | n = 16<br>h = 7.5-16 m       | Line transects (total distance ~200 km)                      | Montane forest                                  | 2613       | n/a        | Both methods detected 3 of 5 primate species known from the area            |
| 15 | McComb et al. 2019       | <b>Behaviour</b><br>Monitoring predation of critically endangered Leadbeater's possum <i>Gymnobelideus leadbeateri</i> at nest boxes by feral cats | Australia        | Information not available    | Stomach content analysis of cats                             | Information not available                       | n/a        | n/a        | n/a                                                                         |
| 16 | Whitworth et al. 2019a   | <b>Inventory, Disturbance effects</b><br>Canopy & terrestrial cameras in protected & non-protected areas. Med-large mammals only                   | Peru             | n = 145<br>h = 3.5-30 m      | Terrestrial cameras<br>n = 77                                | Tropical rainforest                             | 20364      | 11253      | Total = 46<br>Canopy only = 20<br>Terrestrial only = 22<br>Both heights = 4 |
| 17 | Whitworth et al. 2019b   | <b>Behaviour</b><br>Sleeping site use & role in seed dispersal of Geoffroy's spider monkey <i>Ateles geoffroyi</i>                                 | Costa Rica       | n = 39<br>h not stated       | Follows to find sleeping sites & Terrestrial cameras, n = 56 | Tropical rainforest, varying disturbance levels | 1055       | 2287       | n/a                                                                         |
| 18 | Suzuki & Ando 2019       | <b>Species presence</b>                                                                                                                            | Japan            | n = 154                      | n/a                                                          |                                                 | 4620       | n/a        | n/a                                                                         |

# Supplementary Material

|    |                            | Effective rapid survey for endangered Japanese flying squirrel <i>Pteromys momonga</i>                                                                                                                    |           | h = 2-3 m                  |                                                                         | Temperate: conifer-broadleaf            |            |            |                                                                                                    |
|----|----------------------------|-----------------------------------------------------------------------------------------------------------------------------------------------------------------------------------------------------------|-----------|----------------------------|-------------------------------------------------------------------------|-----------------------------------------|------------|------------|----------------------------------------------------------------------------------------------------|
| 19 | Godoy-Guinao et al. 2018   | <b>Behaviour</b><br>Confirming arboreal habits & investigating functional role of small arboreal marsupial <i>Dromiciops gliroides</i>                                                                    | Chile     | n = 6<br>h = 12-21 m       | n/a                                                                     | Temperate forest                        | ~720       | n/a        | n/a                                                                                                |
| 20 | Lama 2018 (Masters thesis) | <b>Species presence, Method, Activity</b><br>(as part of wider terrestrial camera study), comparing the effectiveness of canopy vs. terrestrial cameras to survey red panda <i>Ailurus fulgens</i>        | Nepal     | n = 19<br>h = <10 m        | Terrestrial cameras<br>n = 19                                           | Montane forest                          | ~810       | ~810       | Canopy cameras = 807 photos of target species<br>Terrestrial cameras = 96 photos of target species |
| 21 | Mella et al. 2018          | <b>Behaviour</b><br>Canopy cameras provide first evidence of tree climbing in red fox <i>Vulpes vulpes</i>                                                                                                | Australia | n = 10<br>h = 2.3 m        | n/a                                                                     | Not stated                              | Not stated | n/a        | n/a                                                                                                |
| 22 | Moore & Niyigaba 2018      | <b>Species presence</b><br>Canopy cameras provide first record of Central African oyan <i>Poiana richardsonii</i> in Rwanda                                                                               | Rwanda    | n = 54<br>h = 6-10 m       | n/a                                                                     | Montane rainforest                      | ~4200      | n/a        | Records of up to 8 individual <i>P.richardsonii</i>                                                |
| 23 | Ribeiro-Silva et al. 2018  | <b>Behaviour (multi-taxa)</b><br>Canopy cameras a viable tool for monitoring nest predation of birds, by birds & mammals, in a tropical rainforest environment                                            | Brazil    | n = 68<br>h not stated     | n/a                                                                     | Atlantic Forest - submontane rainforest | 2604       | n/a        | Predator species: 6 mammals (including small-bodied <1 kg) & 6 birds                               |
| 24 | Yang et al. 2018           | <b>Species presence</b><br>Using canopy cameras with other methods to confirm the presence of, and study a new population of critically endangered Myanmar snub-nosed monkey <i>Rhinopithcus strykeri</i> | China     | n not clear<br>h = 15-20 m | Terrestrial cameras, n not stated; transects & follows, faeces analysis | Temperate montane forest                | Not stated | Not stated | Images of species obtained, along with observations & faeces samples from follows                  |
| 25 | Fang et al. 2018           | <b>Monitoring (multi-taxa)</b><br>Canopy & terrestrial cameras to monitor mammals & birds (abstract only – paper in Chinese language)                                                                     | China     | n = 10<br>h = 5-10 m       | Terrestrial camera traps<br>n = 10                                      | Temperate montane forest                | ~1150      | ~1150      | Total = 20<br>Canopy only = 3<br>Terrestrial only = 9<br>Both heights = 8                          |

|    |                              |                                                                                                                                       |                       |                                        |                                      |                                                         |            |      |                                                                                                                                      |
|----|------------------------------|---------------------------------------------------------------------------------------------------------------------------------------|-----------------------|----------------------------------------|--------------------------------------|---------------------------------------------------------|------------|------|--------------------------------------------------------------------------------------------------------------------------------------|
| 26 | Aziz et al. 2017             | <b>Behaviour</b><br>Canopy camera traps to confirm role of island flying fox <i>Pteropus hypomelanus</i> in durian pollination        | Malaysia (Peninsular) | n = 13<br>h = 2-20 m                   | n/a                                  | Fruit orchard (durian)                                  | ~702       | n/a  | Total = 5<br>(target + 4 additional species)                                                                                         |
| 27 | Bowler et al. 2017           | <b>Inventory, Method</b><br>Canopy camera traps vs line transects. Medium-large arboreal mammals only.                                | Peru                  | n = 42<br>h = 16.6-29.9 m              | Transects (total distance = 2014 km) | Lowland tropical rainforest, historic logging & hunting | 3147       | n/a  | Total = 19<br>Canopy cameras only = 6 ( <i>including 1 previously unknown from area</i> )<br>Transects only = 1<br>Both methods = 12 |
| 28 | Gregory et al. 2017          | <b>Bridge use</b><br>Canopy bridge use over gas pipeline                                                                              | Peru                  | n = 25<br>h = 13.5-33.7 m              | Terrestrial cameras<br>n = 112       | Tropical rainforest                                     | 7102       | 7154 | Total = 40<br>Canopy only = 19<br>Terrestrial only = 15<br>Both heights = 6                                                          |
| 29 | Loria & Mendez-Carvajal 2017 | <b>Behaviour</b><br>Use of habitat and activity pattern of whitefaced monkey <i>Cebus imitator</i> (abstract only – paper in Spanish) | Panama                | n not stated<br>h = 8-10 m             | Direct observations                  | Coffee agroforest                                       | 3233       | n/a  | n/a                                                                                                                                  |
| 30 | Suzuki & Ando 2017           | <b>Activity</b><br>Seasonal changes in activity pattern of Japanese flying squirrel <i>Pteromys momonga</i>                           | Japan                 | 214 locations<br>h = 2-3 m             | n/a                                  | Temperate forest                                        | 7317       | n/a  | n/a                                                                                                                                  |
| 31 | Boulerice & Van Fleet 2016   | <b>Species presence</b><br>Canopy cameras & bait tubes to detect northern flying squirrel <i>Glaucomys sabrinus</i>                   | USA                   | n not stated<br>h = 1.5 m<br>bait used | n/a                                  | Temperate pine                                          | 6640       | n/a  | n/a                                                                                                                                  |
| 32 | Cotsell & Vernes 2016        | <b>Behaviour (multi-taxa)</b><br>Examining tree hollow use by birds, mammals & reptiles                                               | Australia             | n = 80<br>h =< 25 m                    | n/a                                  | Eucalyptus forest                                       | 1158       |      | 9 mammals<br>21 birds<br>8 reptiles                                                                                                  |
| 33 | Goldingay & Taylor 2016      | <b>Bridge use</b><br>Canopy bridge use in urban area by koala <i>Phascolarctos cinereus</i>                                           | Australia             | n = 10<br>h = 5 m                      | n/a                                  | Eucalyptus                                              | Not stated | n/a  | Total = 4<br>(target + 3 additional species)                                                                                         |
| 34 | Mills et al. 2016            | <b>Species presence</b><br>Canopy cameras & footprint tracking for small & elusive hazel dormouse                                     | UK                    | n = 5<br>h = ~2.5 m<br>bait used       | n/a                                  | Temperate oak/mixed woodland                            | 405        | n/a  | n/a                                                                                                                                  |

|    |                                   |                                                                                                                                                                   |           |                                                                                   |                                                                                       |                                                        |      |     |                                                                                                                                                                                 |
|----|-----------------------------------|-------------------------------------------------------------------------------------------------------------------------------------------------------------------|-----------|-----------------------------------------------------------------------------------|---------------------------------------------------------------------------------------|--------------------------------------------------------|------|-----|---------------------------------------------------------------------------------------------------------------------------------------------------------------------------------|
|    |                                   | <i>Muscardinus avellanarius</i> & wood mouse <i>Apodemus sylvaticus</i>                                                                                           |           |                                                                                   |                                                                                       |                                                        |      |     |                                                                                                                                                                                 |
| 35 | Suzuki et al. 2016                | <b>Activity</b><br>Diurnal activity of juvenile Russian flying squirrels <i>Pteromys volans</i>                                                                   | Japan     | n = 1<br>h = 2.6 m                                                                | n/a                                                                                   | Temperate forest                                       | ~26  | n/a | n/a                                                                                                                                                                             |
| 36 | Whitworth et al. 2016             | <b>Inventory, Method</b><br>Canopy cameras vs line transects & incidental observations. Medium-large arboreal mammals only.                                       | Peru      | Total n = 30:<br><br>h = 10 m (n = 15)<br>h = 18.4-33 m (n = 15)                  | Transects (total distance = ~78 km) & incidental observations from year-round surveys | Disturbed tropical rainforest – some logging & hunting | 2929 | n/a | Total = 24<br>Canopy cameras = 18 (6 exclusive to method, 1 previously unknown from area)<br>Transects = 13 (1 exclusive to method)<br>Observation = 18 (5 exclusive to method) |
| 37 | Gregory et al. 2015               | <b>Species presence, Behaviour, Activity</b><br>Confirming range extension & describing activity & behaviours of streaked dwarf porcupine <i>Coendou ichillus</i> | Peru      | n not clear (part of larger study, see Gregory et al. 2014, 2017)<br>h not stated | Live trapping mid-canopy                                                              | Tropical rainforest                                    | 7198 | n/a | Records represent range extension of 900 km                                                                                                                                     |
| 38 | Rivas-Romero & Soto-Shoender 2015 | <b>Behaviour (multi-taxa), Method</b><br>Canopy camera traps as a method of examining frugivory in birds and mammals                                              | Guatemala | n = 8<br>h = 10-15 m                                                              | n/a                                                                                   | Tropical cloud forest                                  | 902  | n/a | 3 mammal species<br>9 bird species                                                                                                                                              |
| 39 | Soanes et al. 2015                | <b>Bridge use</b><br>Monitoring use of bridges & glider poles across a highway by arboreal marsupials                                                             | Australia | n = not clear<br>h = 4-18 m                                                       | Transponder tags & readers                                                            | Agricultural land & multi-lane highway                 | 3929 | n/a | 5 species confirmed to use crossing structures                                                                                                                                  |
| 40 | Yokochi & Bencini 2015            | <b>Bridge use</b><br>Rapid habituation to rope bridge by endangered western ringtail possum <i>Pseudocheirus occidentalis</i>                                     | Australia | n = 1<br>h = 8.5 m                                                                | Live capture & transponder tagging                                                    | Peppermint trees across major road                     | 270  | n/a | n/a                                                                                                                                                                             |
| 41 | Fonturbel et al. 2014             | <b>Activity</b><br>Activity pattern of monito del monte, <i>Dromiciops gliroides</i> (small arboreal marsupial)                                                   | Chile     | n = 25<br>h not stated<br>bait used                                               | n/a                                                                                   | Temperate rainforest &                                 | 5012 | n/a | n/a                                                                                                                                                                             |

|    |                         |                                                                                                                                                     |                    |                                    |                                            |                                                |            |       |                                                                            |
|----|-------------------------|-----------------------------------------------------------------------------------------------------------------------------------------------------|--------------------|------------------------------------|--------------------------------------------|------------------------------------------------|------------|-------|----------------------------------------------------------------------------|
|    |                         |                                                                                                                                                     |                    |                                    |                                            | Eucalyptus plantations                         |            |       |                                                                            |
| 42 | Gregory et al. 2014     | <b>Method, Bridge use</b><br>First major study on canopy camera effectiveness in context of monitoring canopy bridges over gas pipeline             | Peru               | n = 25<br>h = 13.5-33.7 m          | n/a                                        | Tropical rainforest                            | 3608       | n/a   | Total = 20                                                                 |
| 43 | Harley et al. 2014      | <b>Species presence</b><br>Canopy cameras to detect cryptic Leadbeater's possum, <i>Gymnobelideus leadbeateri</i>                                   | Australia          | n = 15<br>h = 3-4 m<br>bait used   | n/a                                        | Eucalyptus forest                              | 1519       | n/a   | Total = 5<br>(target + 4 additional species)                               |
| 44 | Mendez-Carvajal 2014    | <b>Method</b><br>Testing system of setting canopy cameras without need to climb trees                                                               | Panama             | n = 13<br>h = 8-18 m               | n/a                                        | Tropical montane forest                        | 232        | n/a   | Canopy only = 10                                                           |
| 45 | Goldingay et al. 2013   | <b>Bridge use</b><br>Arboreal mammals use of rope bridges across a major highway                                                                    | Australia          | n not stated<br>h not stated       | n/a                                        | Not stated                                     | Not stated | n/a   | Total = 4                                                                  |
| 46 | Soanes et al. 2013      | <b>Bridge use</b><br>Effectiveness of road-crossing mitigation for squirrel glider <i>Petaurus norfolcensis</i>                                     | Australia          | n = 7<br>h = 6-14 m                | Radio-tracking & transponder tags          | Agricultural land & highway                    | 1806       | n/a   | n/a                                                                        |
| 47 | Tan et al. 2013         | <b>Activity</b><br>Canopy cameras reveal nocturnal activity in presumptive diurnal primate: Guizhou snub-nosed monkey <i>Rhinopithecus brelichi</i> | China              | n = 2<br>h = 5-6 m                 | n/a                                        | Temperate evergreen & broadleaf forest         | 294        | n/a   | n/a                                                                        |
| 48 | Teixeira et al. 2013    | <b>Bridge use</b><br>Monitoring wildlife use of road overpasses in fragmented urban landscapes.                                                     | Brazil             | n = 6<br>h not stated              | Community observational monitoring         | Semi-deciduous seasonal forest patches & roads | 689        | n/a   | Camera traps = 3<br>Community observation = 2 (same species as cameras)    |
| 49 | Wahyudi & Stuebing 2013 | <b>(Primarily terrestrial)</b><br>Wildlife monitoring in mixed use landscape                                                                        | Indonesia (Borneo) | n = 17<br>h = 10-12 m<br>lure used | Terrestrial cameras<br>n = 40<br>lure used | Disturbed forest & oil palm                    | 424        | 8204  | Total = 33<br>Canopy only = 8<br>Terrestrial only = 23<br>Both heights = 2 |
| 50 | Cassano et al. 2012     | <b>Disturbance effects</b>                                                                                                                          | Brazil             | n = 18<br>h = 3-4 m                | Terrestrial cameras                        |                                                | ~2000      | ~2000 | Total = 22<br>Canopy = 6                                                   |

# Supplementary Material

|    |                                    | Mammal use of agroforest vs forest:<br>canopy & terrestrial camera traps.<br>Large-bodied species only.                                                                                                                                         |                       | bait used                       | n = 18                                                          | Logged<br>forest &<br>agroforest  |               |               | Terrestrial = 16                                                            |
|----|------------------------------------|-------------------------------------------------------------------------------------------------------------------------------------------------------------------------------------------------------------------------------------------------|-----------------------|---------------------------------|-----------------------------------------------------------------|-----------------------------------|---------------|---------------|-----------------------------------------------------------------------------|
| 51 | Dalloz et al.<br>2012              | <b>Behaviour</b><br>Climbing behaviour in bare-tailed<br>woolly opossum, <i>Caluromys</i><br><i>philander</i>                                                                                                                                   | Brazil                | n = 10<br>h = 2.5-5 m           | n/a                                                             | Montane<br>forest                 | ~3650         | n/a           | Total = 10<br>(target + 9 additional<br>species)                            |
| 52 | Olson et al.<br>2012               | <b>Species presence</b><br>Validate sightings of greater bamboo<br>lemur, <i>Prolemur simus</i> (critically<br>endangered)                                                                                                                      | Madagascar            | n = 7<br>h = 2-14 m             | n/a                                                             | Tropical<br>rainforest            | 231           | n/a           | n/a                                                                         |
| 53 | Van Berkel<br>et al. 2012          | <b>(Primarily terrestrial)</b><br>Biodiversity survey                                                                                                                                                                                           | Indonesia<br>(Borneo) | n = 2<br>h not stated           | Terrestrial<br>cameras<br>n = 25                                | Tropical<br>rainforest            | 7             | 570           | Total = 26<br>Canopy only = 2<br>Terrestrial only = 24                      |
| 54 | Weston et al.<br>2011              | <b>Bridge use</b><br>Canopy bridge use over roads                                                                                                                                                                                               | Australia             | n not stated<br>h = 7-8 m       | Observation,<br>scat collection,<br>hair funnels                | Tropical<br>rainforest            | Not<br>stated | n/a           | Total on cameras = 7<br>Detected by other<br>methods but not<br>cameras = 2 |
| 55 | Oliveira-<br>Santos et al.<br>2008 | <b>Activity</b><br>Activity patterns of small arboreal<br>mammals                                                                                                                                                                               | Brazil                | n = 3<br>h = 3-6 m<br>bait used | Terrestrial<br>cameras (data<br>from different<br>study) n = 14 | Atlantic<br>Forest                | Not<br>stated | Not<br>stated | Canopy cameras = 11<br>(Terrestrial cameras<br>targeted only 1<br>species)  |
| 56 | Forsman &<br>Swingle<br>2007       | <b>Behaviour (multi-taxa)</b><br>Use of arboreal tree vole <i>Arborimus</i><br><i>spp.</i> nests by amphibians                                                                                                                                  | USA                   | n = 3<br>h not stated           | n/a                                                             | Temperate<br>forest               | Not<br>stated | n/a           | n/a                                                                         |
| 57 | Jayasekara<br>et al. 2007          | <b>Behaviour</b><br>Using canopy and terrestrial camera<br>traps to study frugivory at fruiting<br>trees                                                                                                                                        | Sri Lanka             | n = 15<br>h <35 m<br>bait used  | Terrestrial<br>cameras<br>n = 15                                | Tropical<br>lowland<br>rainforest | Not<br>stated | Not<br>stated | Total = 14<br>Canopy only = 5<br>Terrestrial only = 6<br>Both = 3           |
| 58 | Malt & Lank<br>2007                | <b>Behaviour, Activity</b><br><b>(multi-taxa)</b><br>Nest predation & activity patterns of<br>marbled murrelet <i>Brachyramphus</i><br><i>marmoratus</i> , red squirrel<br><i>Tamiasciurus hudsonicus</i> & deer<br>mice <i>Peromyscus spp.</i> | Canada                | n = 136<br>h = 25 ± 7 m         | Artificial nests<br>constructed                                 | Temperate<br>forest               | Not<br>stated | n/a           | n/a                                                                         |



|    |                     |                                                                                                                                |            |                                      |                                                                                                                                     |                                  |               |               |                                                                                                                           |
|----|---------------------|--------------------------------------------------------------------------------------------------------------------------------|------------|--------------------------------------|-------------------------------------------------------------------------------------------------------------------------------------|----------------------------------|---------------|---------------|---------------------------------------------------------------------------------------------------------------------------|
| 59 | Schipper 2007       | <b>Method</b><br>Camera trap avoidance by kinkajous, <i>Potos flavus</i>                                                       | Costa Rica | n = 1<br>h = 15 m                    | n/a                                                                                                                                 | Moist forest                     | 20            | n/a           | n/a                                                                                                                       |
| 60 | Goosem et al. 2005  | <b>Bridge use</b><br>Testing the effectiveness of rope overpasses & faunal underpasses for wildlife connectivity across a road | Australia  | n = ~3<br>h = 7-7.5 m                | Overpasses:<br>Spotlighting,<br>hair & scat<br>collection;<br>Underpasses:<br>Sand-tracks,<br>roadkill,<br>occasional<br>camera use | Highland<br>rainforest &<br>road | Not<br>stated | Not<br>stated | 6 arboreal species<br>detected by cameras,<br>7 detected by scat<br>collection,<br>4 by spotlighting,<br>2 by hair sample |
| 61 | Hirakawa 2005       | <b>Method</b><br>Testing a new bat lure                                                                                        | Japan      | n = 40<br>h = 1.5 m<br>lure used     | n/a                                                                                                                                 | Temperate<br>forest              | ~400          | n/a           | n/a                                                                                                                       |
| 62 | Kierulff et al 2004 | <b>Species presence</b><br>Surveying buff-headed capuchin, <i>Cebus xanthosternos</i> (endangered & elusive)                   | Brazil     | n not stated<br>h = 2 m<br>bait used | n/a                                                                                                                                 | Atlantic<br>Forest               | Not<br>stated | n/a           | n/a                                                                                                                       |
| 63 | Otani 2001          | <b>Behaviour</b><br>Measuring fig foraging by Yakushima macaque, <i>Macaca fuscata yakui</i>                                   | Japan      | n = 7<br>h = 10 m                    | n/a                                                                                                                                 | Temperate<br>forest              | ~77           | n/a           | n/a                                                                                                                       |

**Table S2. Mammal species recorded by camera-traps in terrestrial and canopy strata in unlogged and logged forest (noted in parentheses where the detections contradict available knowledge from field guides). Species are grouped according to: IUCN threat status ('threatened' = categories Vulnerable, Endangered or Critically Endangered; 'not threatened' = Near Threatened, Least Concern or Data Deficient); body size (small <1 kg, medium 1-5 kg, large >5 kg); and broad taxonomic group (with elephant included in 'ungulates' and pangolin with 'Insectivora', according to closest relatives and/or feeding strategy). Species names in parentheses are those detected only by our experimental second canopy camera-traps (Bornean pygmy squirrel and Temminck's flying squirrel). Species shaded grey are those thought to be present at our sampling locations and likely detectable using camera-traps, but not detected in this study. Assumption of presence and detectability was based on known body size, geographic distribution, elevation range, habitat preferences (information obtained from Payne & Francis 2007, and the IUCN Red List, accessed February 2021), as well as data from live-trapping studies at our sampling locations (S. Heon, *pers. comm.*). \*Asterisks denote species endemic to Borneo. Note that Brooke's squirrel was previously known only from mountains outside of our sampling locations, and our records here likely reflect a range expansion. Three species frequently detected by canopy camera-traps, but recorded once each on terrestrial camera-traps, were classed as arboreal in line with available knowledge and considering the one-off nature of these records in the context of our extensive sampling period. These species were: Thomas' flying squirrel (1 terrestrial record, 58 canopy records), Sabah grey langur (1 terrestrial record, 98 canopy records) and maroon langur (1 terrestrial record, 230 canopy records).**

| Order     | Family      | Species                         | Forest type:<br>Detected vs.<br>(presumed,<br>where different) | Strata:<br>Detected vs.<br>(presumed,<br>where different) | IUCN<br>Threat<br>Status | Body<br>Size | Taxonomic<br>Group |
|-----------|-------------|---------------------------------|----------------------------------------------------------------|-----------------------------------------------------------|--------------------------|--------------|--------------------|
| Carnivora | Felidae     | <i>Catopuma badia</i> *         | n/a                                                            | n/a                                                       | threatened               | medium       | Carnivora          |
|           |             | Borneo bay cat*                 | (both)                                                         | (terrestrial)                                             |                          |              |                    |
|           |             | <i>Neofelis diardi</i>          | Both                                                           | Terrestrial                                               | threatened               | large        | Carnivora          |
|           |             | Sunda clouded leopard           |                                                                | (semi-arboreal)                                           |                          |              |                    |
|           |             | <i>Pardofellis marmorata</i>    | Both                                                           | Terrestrial                                               | not                      | medium       | Carnivora          |
|           |             | Marbled cat                     |                                                                | (semi-arboreal)                                           | threatened               |              |                    |
|           |             | <i>Prionailurus bengalensis</i> | Both                                                           | Terrestrial                                               | not                      | medium       | Carnivora          |
|           |             | Leopard cat                     |                                                                |                                                           | threatened               |              |                    |
|           |             | <i>Prionailurus planiceps</i>   | n/a                                                            | n/a                                                       | threatened               | medium       | Carnivora          |
|           |             | Flat-headed cat                 | (both)                                                         | (terrestrial)                                             |                          |              |                    |
|           | Herpestidae | <i>Herpestes brachyurus</i>     | Both                                                           | Terrestrial                                               | not                      | medium       | Carnivora          |
|           |             | Short-tailed mongoose           |                                                                |                                                           | threatened               |              |                    |

|                 |                |                                                            |                    |                                |                   |        |           |
|-----------------|----------------|------------------------------------------------------------|--------------------|--------------------------------|-------------------|--------|-----------|
| Cetartiodactyla | Mustelidae     | <i>Herpestes semitorquatus</i><br>Collared mongoose        | Unlogged<br>(both) | Terrestrial                    | not<br>threatened | medium | Carnivora |
|                 |                | <i>Martes flavigula</i><br>Yellow-throated marten          | Both               | Semi-arboreal                  | not<br>threatened | medium | Carnivora |
|                 |                | <i>Mustela nudipes</i><br>Malay weasel                     | n/a<br>(both)      | n/a<br>(terrestrial)           | not<br>threatened | medium | Carnivora |
|                 |                | <i>Mydaus javanensis</i><br>Sunda stink badger             | Both               | Terrestrial                    | not<br>threatened | medium | Carnivora |
|                 | Viverridae     | <i>Arctictis binturong</i><br>Binturong                    | Both               | Semi-arboreal                  | threatened        | large  | Carnivora |
|                 |                | <i>Arctogalidia trivirgata</i><br>Small-toothed palm civet | Both               | Arboreal                       | not<br>threatened | medium | Carnivora |
|                 |                | <i>Cynogale bennettii</i><br>Otter civet                   | n/a<br>(both)      | n/a<br>(terrestrial)           | threatened        | medium | Carnivora |
|                 |                | <i>Hemigalus derbyanus</i><br>Banded civet                 | Both               | Semi-arboreal                  | not<br>threatened | medium | Carnivora |
|                 |                | <i>Hemigalus hosei</i> *<br>Hose's civet*                  | n/a<br>(both)      | n/a<br>(terrestrial)           | threatened        | medium | Carnivora |
|                 |                | <i>Paguma larvata</i><br>Masked palm civet                 | Both               | Terrestrial<br>(semi-arboreal) | not<br>threatened | medium | Carnivora |
|                 |                | <i>Paradoxurus hermaphroditus</i><br>Common palm civet     | Unlogged<br>(both) | Terrestrial<br>(semi-arboreal) | not<br>threatened | medium | Carnivora |
|                 |                | <i>Viverra zangara</i><br>Malay civet                      | Both               | Terrestrial                    | not<br>threatened | medium | Carnivora |
|                 | Prionodontidae | <i>Prionodon linsang</i><br>Banded linsang                 | n/a<br>(both)      | n/a<br>(semi-arboreal)         | not<br>threatened | medium | Carnivora |
|                 | Ursidae        | <i>Helarctos malayanus</i><br>Sun bear                     | Both               | Terrestrial<br>(semi-arboreal) | threatened        | large  | Carnivora |
|                 | Suidae         | <i>Sus barbatus</i><br>Bearded pig                         | Both               | Terrestrial                    | threatened        | large  | Ungulates |
|                 | Tragulidae     | <i>Tragulus kanchil</i><br>Lesser mousedeer                | Both               | Terrestrial                    | not<br>threatened | medium | Ungulates |
|                 |                | <i>Tragulus napu</i><br>Greater mousedeer                  | Both               | Terrestrial                    | not<br>threatened | medium | Ungulates |

Supplementary Material

|              |                 |                                                       |                    |                                |                   |        |                    |
|--------------|-----------------|-------------------------------------------------------|--------------------|--------------------------------|-------------------|--------|--------------------|
| Dermoptera   | Cervidae        | <i>Muntiacus atherodes</i><br>Bornean yellow muntjac  | Both               | Terrestrial                    | not<br>threatened | large  | Ungulates          |
|              |                 | <i>Muntiacus muntjak</i><br>Red muntjac               | Both               | Terrestrial                    | not<br>threatened | large  | Ungulates          |
|              |                 | <i>Rusa unicolor</i><br>Sambar deer                   | Both               | Terrestrial                    | threatened        | large  | Ungulates          |
|              | Bovidae         | <i>Bos javanicus</i><br>Banteng                       | Logged<br>(both)   | Terrestrial                    | threatened        | large  | Ungulates          |
|              |                 | <i>Galeopterus variegatus</i><br>Sunda colugo         | Both               | Arboreal                       | not<br>threatened | medium | Gliding<br>mammals |
| Eulipotyphla | Erinaceidae     | <i>Echinosorex gymnura</i><br>Moonrat                 | Both               | Terrestrial                    | not<br>threatened | small  | Insectivora        |
| Pholidota    | Manidae         | <i>Manis javanica</i><br>Sunda pangolin               | Both               | Terrestrial<br>(semi-arboreal) | threatened        | medium | Insectivora        |
| Primates     | Cercopithecidae | <i>Presbytis rubicunda</i> *<br>Maroon langur*        | Both               | Arboreal                       | threatened        | large  | Primates           |
|              |                 | <i>Presbytis sabana</i> *<br>Sabah grey langur*       | Unlogged<br>(both) | Arboreal                       | threatened        | large  | Primates           |
|              |                 | <i>Macaca fascicularis</i><br>Long-tailed macaque     | Unlogged<br>(both) | Semi-arboreal                  | threatened        | large  | Primates           |
|              |                 | <i>Macaca nemestrina</i><br>Pig-tailed macaque        | Both               | Semi-arboreal                  | threatened        | large  | Primates           |
|              | Hylobatidae     | <i>Hylobates funereus</i> *<br>Bornean gibbon*        | Both               | Arboreal                       | threatened        | large  | Primates           |
|              |                 | <i>Nycticebus menagensis</i><br>Philippine slow loris | n/a<br>(both)      | n/a<br>(arboreal)              | threatened        | small  | Primates           |
|              | Pongidae        | <i>Pongo pygmaeus</i> *<br>Bornean orangutan*         | Logged             | Semi-arboreal                  | threatened        | large  | Primates           |
|              | Tarsiidae       | <i>Cephalopacus bancanus</i><br>Horsfield's tarsier   | n/a<br>(both)      | n/a<br>(arboreal)              | threatened        | small  | Primates           |
| Proboscidea  | Elephantidae    | <i>Elephas maximus</i><br>Asian elephant              | Logged<br>(both)   | Terrestrial                    | threatened        | large  | Ungulates          |

|          |           |                                                              |                    |                             |                   |        |                        |
|----------|-----------|--------------------------------------------------------------|--------------------|-----------------------------|-------------------|--------|------------------------|
| Rodentia | Sciuridae | <i>Aeromys tephromelas</i><br>Black flying squirrel          | Both               | Arboreal                    | not<br>threatened | medium | Gliding<br>mammals     |
|          |           | <i>Aeromys thomasi</i> *<br>Thomas' flying squirrel*         | Both               | Arboreal                    | not<br>threatened | medium | Gliding<br>mammals     |
|          |           | <i>Callosciurus adamsi</i> *<br>Ear-spot squirrel*           | Logged<br>(both)   | Arboreal<br>(semi-arboreal) | not<br>threatened | small  | Non-gliding<br>Rodents |
|          |           | <i>Callosciurus notatus</i><br>Plantain squirrel             | n/a<br>(both)      | n/a<br>(semi-arboreal)      | not<br>threatened | small  | Non-gliding<br>Rodents |
|          |           | <i>Callosciurus prevostii</i><br>Prevost's squirrel          | Both               | Arboreal                    | not<br>threatened | small  | Non-gliding<br>Rodents |
|          |           | <i>Callosciurus sp.</i><br>Large mystery squirrel            | Logged<br>(both?)  | Arboreal                    | ?                 | small  | Non-gliding<br>Rodents |
|          |           | <i>(Exilisciurus exilis*)</i><br>(Bornean pygmy squirrel*)   | Unlogged<br>(both) | Arboreal                    | not<br>threatened | small  | Non-gliding<br>Rodents |
|          |           | <i>Hylopetes spadiceus</i><br>Red-cheeked flying squirrel    | n/a<br>(both)      | n/a<br>(arboreal)           | not<br>threatened | small  | Gliding<br>mammals     |
|          |           | <i>Iomys horsfieldi</i><br>Horsfield's flying squirrel       | Logged<br>(both)   | Arboreal                    | not<br>threatened | small  | Gliding<br>mammals     |
|          |           | <i>Lariscus hosei</i> *<br>Four-striped ground squirrel*     | n/a<br>(both)      | n/a<br>(terrestrial)        | not<br>threatened | small  | Non-gliding<br>Rodents |
|          |           | <i>Petaurillus hosei</i> *<br>Hose's pygmy flying squirrel*  | n/a<br>(unlogged)  | n/a<br>(arboreal)           | not<br>threatened | small  | Gliding<br>mammals     |
|          |           | <i>Petaurista petaurista</i><br>Red giant flying squirrel    | Unlogged<br>(both) | Arboreal                    | not<br>threatened | medium | Gliding<br>mammals     |
|          |           | <i>Petinomys genibarbis</i><br>Whiskered flying squirrel     | n/a<br>(both)      | n/a<br>(arboreal)           | Threatened        | small  | Gliding<br>mammals     |
|          |           | <i>(Petinomys setosus)</i><br>(Temminck's flying squirrel)   | Unlogged<br>(both) | Arboreal                    | Threatened        | small  | Gliding<br>mammals     |
|          |           | <i>Pteromyscus pulverulentus</i><br>Smoky flying squirrel    | Unlogged           | Arboreal                    | Threatened        | small  | Gliding<br>mammals     |
|          |           | <i>Ratufa affinis</i><br>Giant squirrel                      | Both               | Arboreal                    | not<br>threatened | medium | Non-gliding<br>Rodents |
|          |           | <i>Rheithrosciurus macrotis</i> *<br>Tufted ground squirrel* | Both               | Semi-arboreal               | Threatened        | medium | Non-gliding<br>Rodents |

## Supplementary Material

|             |                                 |            |                 |            |        |             |
|-------------|---------------------------------|------------|-----------------|------------|--------|-------------|
| Muridae     | <i>Sundasciurus brookei</i> *   | Both       | Arboreal        | not        | small  | Non-gliding |
|             | Brooke's squirrel*              | (unlogged) |                 | threatened |        | Rodents     |
|             | <i>Sundasciurus lowii</i>       | Both       | Semi-arboreal   | not        | small  | Non-gliding |
|             | Low's squirrel                  |            |                 | threatened |        | Rodents     |
|             | <i>Sundasciurus hippurus</i>    | Both       | Semi-arboreal   | not        | small  | Non-gliding |
|             | Horse-tailed squirrel           |            |                 | threatened |        | Rodents     |
|             | <i>Chiropodomys major</i> *     | n/a        | n/a             | not        | small  | Non-gliding |
|             | Large pencil-tailed tree mouse* | (both)     | (arboreal)      | threatened |        | Rodents     |
|             | <i>Haeromys margarettae</i> *   | n/a        | n/a             | not        | small  | Non-gliding |
|             | Ranee mouse*                    | (both)     | (semi-arboreal) | threatened |        | Rodents     |
|             | <i>Leopoldamys sabanus</i>      | Unlogged   | Terrestrial     | not        | small  | Non-gliding |
|             | Long-tailed giant rat           | (both)     |                 | threatened |        | Rodents     |
|             | <i>Maxomys baeodon</i> *        | n/a        | n/a             | not        | small  | Non-gliding |
|             | Small spiny rat*                | (both)     | (terrestrial)   | threatened |        | Rodents     |
|             | <i>Maxomys ochraceiventer</i> * | n/a        | n/a             | not        | small  | Non-gliding |
|             | Chestnut-bellied spiny rat*     | (both)     | (terrestrial)   | threatened |        | Rodents     |
|             | <i>Maxomys rajah</i>            | Unlogged   | Terrestrial     | Threatened | small  | Non-gliding |
|             | Brown spiny rat                 |            |                 |            |        | Rodents     |
|             | <i>Maxomys surifer</i>          | Logged     | Terrestrial     | not        | small  | Non-gliding |
|             | Red spiny rat                   |            |                 | threatened |        | Rodents     |
| Hystricidae | <i>Maxomys whiteheadi</i>       | Unlogged   | Terrestrial     | threatened | small  | Non-gliding |
|             | Whitehead's rat                 | (both)     |                 |            |        | Rodents     |
|             | <i>Niviventer cremoriventer</i> | n/a        | n/a             | not        | small  | Non-gliding |
|             | Dark-tailed tree rat            | (both)     | (semi-arboreal) | threatened |        | Rodents     |
|             | <i>Sundamys muelleri</i>        | n/a        | n/a             | not        | small  | Non-gliding |
|             | Muller's rat                    | (both)     | (semi-arboreal) | threatened |        | Rodents     |
|             | <i>Hystrix brachyura</i>        | Both       | Terrestrial     | not        | medium | Non-gliding |
|             | Malay porcupine                 |            |                 | threatened |        | Rodents     |
|             | <i>Hystrix crassispinis</i> *   | Both       | Terrestrial     | not        | medium | Non-gliding |
|             | Thick-spined porcupine*         |            |                 | threatened |        | Rodents     |
|             | <i>Trichys fasciculata</i>      | Both       | Terrestrial     | not        | medium | Non-gliding |
|             | Long-tailed porcupine           |            |                 | threatened |        | Rodents     |

|            |               |                                               |                  |                 |                   |       |             |
|------------|---------------|-----------------------------------------------|------------------|-----------------|-------------------|-------|-------------|
| Scandentia | Ptilocercidae | <i>Ptilocercus lowii</i><br>Pentail treeshrew | Logged<br>(both) | Arboreal        | not<br>threatened | small | Insectivora |
|            | Tupaiaidae    | <i>Tupaia dorsalis</i> *                      | n/a              | n/a             | not               | small | Insectivora |
|            |               | Striped treeshrew*                            | (both)           | (terrestrial)   | threatened        |       |             |
|            |               | <i>Tupaia gracilis</i> *                      | n/a              | n/a             | not               | small | Insectivora |
|            |               | Slender treeshrew*                            | (both)           | (semi-arboreal) | threatened        |       |             |
|            |               | <i>Tupaia longipes</i> *                      | Both             | Semi-arboreal   | not               | small | Insectivora |
|            |               | Plain treeshrew*                              |                  | (terrestrial)   | threatened        |       |             |
|            |               | <i>Tupaia tana</i>                            | Unlogged         | Terrestrial     | not               | small | Insectivora |
|            |               | Large treeshrew                               | (both)           |                 | threatened        |       |             |
|            |               | <i>Tupaia minor</i>                           | Unlogged         | Terrestrial     | not               | small | Insectivora |
|            |               | Lesser treeshrew                              | (both)           | (semi-arboreal) | threatened        |       |             |

**Table S3. Community structure of mammals in each strata and forest type, according to capture events per 100 camera trap nights (CTN). Canopy data are from single canopy camera-traps, except records of Bornean pygmy squirrel, Temminck's flying squirrel and horse-tailed squirrel in unlogged forest, and banded civet in logged forest, which were only detected by our additional canopy camera-traps at those sites (marked by parentheses). Note that the orangutan is known to be absent from Maliau Basin, our unlogged site. Asterisks denote species endemic to Borneo. Shading denotes no captures in that strata and forest type. Indicator species analyses utilised data from the first 91 CTN at each camera location to visualise similarities or dissimilarities between mammal community structure across forest type and, separately, across strata. No indicator species were identified that could be aligned with unlogged or logged forest since the community-level differences between these habitats were weak. Species reported are therefore indicators of terrestrial or canopy strata (denoted 'T' or 'C') according to vector fitting (envfit) or Pearson's coefficient of association based on the ordination and species detection data. Significant values are highlighted in bold.**

| Species                                                  | Capture Events per 100 CTN |                          |                                 |                               | Indicator species<br>(Envfit test) |                  | Indicator species<br>(Pearson association) |                      |
|----------------------------------------------------------|----------------------------|--------------------------|---------------------------------|-------------------------------|------------------------------------|------------------|--------------------------------------------|----------------------|
|                                                          | Canopy Cameras<br>Unlogged | Canopy Cameras<br>Logged | Terrestrial Cameras<br>Unlogged | Terrestrial Cameras<br>Logged | R <sup>2</sup>                     | P value          | Φ                                          | P value              |
| Sunda clouded leopard, <i>Neofelis diardi borneensis</i> |                            |                          | 0.48                            | 0.04                          | 0.03                               | 0.348            | 0.21                                       | 0.082                |
| Marbled cat, <i>Pardofellis marmorata</i>                |                            |                          | 0.08                            | 0.08                          | 0.03                               | 0.237            | 0.17                                       | 0.193                |
| Leopard cat, <i>Prionailurus bengalensis</i>             |                            |                          | 0.28                            | 0.41                          | 0.07                               | 0.045            | <b>0.33</b>                                | <b>0.002 (T)</b>     |
| Short-tailed mongoose, <i>Herpestes brachyurus</i>       |                            |                          | 0.63                            | 0.34                          | 0.05                               | 0.116            | <b>0.26</b>                                | <b>0.002 (T)</b>     |
| Collared mongoose, <i>Herpestes semitorquatus</i>        |                            |                          | 0.13                            |                               |                                    |                  |                                            |                      |
| Yellow-throated marten, <i>Martes flavigula</i>          | 0.18                       | 0.19                     | 0.25                            | 0.30                          | 0.03                               | 0.325            | 0.02                                       | 0.924                |
| Sunda stink badger, <i>Mydaus javanensis</i>             |                            |                          | 0.05                            | 0.04                          |                                    |                  |                                            |                      |
| Binturong, <i>Arctictis binturong</i>                    | 0.25                       | 0.16                     | 0.08                            | 0.08                          | 0.01                               | 0.833            | 0.05                                       | 0.713                |
| Small-toothed palm civet, <i>Arctogalidia trivirgata</i> | 0.31                       | 1.73                     |                                 |                               | <b>0.19</b>                        | <b>0.001 (C)</b> | <b>0.42</b>                                | <b>&lt;0.001 (C)</b> |
| Banded civet, <i>Hemigalus derbyanus</i>                 |                            | (0.01)                   | 2.88                            | 1.39                          | <b>0.15</b>                        | <b>0.004 (T)</b> | <b>0.47</b>                                | <b>&lt;0.001 (T)</b> |
| Masked palm civet, <i>Paguma larvata</i>                 |                            |                          | 0.23                            | 0.11                          | 0.07                               | 0.063            | <b>0.25</b>                                | <b>0.031 (T)</b>     |
| Common palm civet, <i>Paradoxurus hermaphroditus</i>     |                            |                          | 0.08                            |                               |                                    |                  |                                            |                      |
| Malay civet, <i>Viverra zibetha</i>                      |                            |                          | 3.58                            | 5.14                          | <b>0.27</b>                        | <b>0.001 (T)</b> | <b>0.60</b>                                | <b>&lt;0.001 (T)</b> |
| Sun bear, <i>Helarctos malayanus</i>                     |                            |                          | 1.20                            | 2.14                          | <b>0.17</b>                        | <b>0.003 (T)</b> | <b>0.39</b>                                | <b>&lt;0.001 (T)</b> |
| Bearded pig, <i>Sus barbatus</i>                         |                            |                          | 9.61                            | 28.84                         | <b>0.12</b>                        | <b>0.010 (T)</b> | <b>0.43</b>                                | <b>&lt;0.001 (T)</b> |
| Lesser mousedeer, <i>Tragulus kanchil</i>                |                            |                          | 2.73                            | 8.18                          | 0.08                               | 0.058            | <b>0.28</b>                                | <b>&lt;0.001 (T)</b> |
| Greater mousedeer, <i>Tragulus napu</i>                  |                            |                          | 14.62                           | 11.97                         | <b>0.18</b>                        | <b>0.001 (T)</b> | <b>0.53</b>                                | <b>&lt;0.001 (T)</b> |
| Bornean yellow muntjac, <i>Muntiacus atherodes</i>       |                            |                          | 14.59                           | 21.91                         | <b>0.19</b>                        | <b>0.002 (T)</b> | <b>0.51</b>                                | <b>&lt;0.001 (T)</b> |



|                                                            |        |      |       |       |             |                  |             |                      |
|------------------------------------------------------------|--------|------|-------|-------|-------------|------------------|-------------|----------------------|
| Red muntjac, <i>Muntiacus muntjak</i>                      |        |      | 13.29 | 9.00  | <b>0.20</b> | <b>0.001 (T)</b> | <b>0.53</b> | <b>&lt;0.001 (T)</b> |
| Sambar deer, <i>Rusa unicolor</i>                          |        |      | 1.18  | 3.98  | 0.08        | 0.047            | <b>0.36</b> | <b>&lt;0.001 (T)</b> |
| Banteng, <i>Bos javanicus</i>                              |        |      |       | 1.16  | 0.02        | 0.306            | 0.13        | 0.199                |
| Sunda colugo, <i>Galeopterus variegatus</i>                | 0.05   | 0.03 |       |       | 0.03        | 0.213            | 0.11        | 1.000                |
| Moonrat, <i>Echinosorex gymnurus</i>                       |        |      | 0.58  | 0.11  | 0.06        | 0.105            | <b>0.28</b> | <b>0.007 (T)</b>     |
| Sunda pangolin, <i>Manis javanica</i>                      |        |      | 0.23  | 0.04  | 0.03        | 0.312            | 0.17        | 0.194                |
| Bornean gibbon*, <i>Hylobates funereus</i> *               | 0.71   | 1.03 |       |       | 0.05        | 0.128            | <b>0.25</b> | <b>0.011 (C)</b>     |
| Orangutan*, <i>Pongo pygmaeus</i> *                        |        | 0.93 |       | 0.83  | 0.01        | 0.587            | 0.03        | 0.811                |
| Maroon langur*, <i>Presbytis rubicunda</i> *               | 3.41   | 0.61 |       |       | 0.04        | 0.186            | <b>0.14</b> | <b>0.043 (C)</b>     |
| Sabah grey langur*, <i>Presbytis sabana</i> *              | 1.57   |      |       |       | <b>0.09</b> | <b>0.029 (C)</b> | 0.22        | 0.060                |
| Long-tailed macaque, <i>Macaca fascicularis</i>            | 1.16   |      | 0.15  |       | <b>0.12</b> | <b>0.014 (C)</b> | 0.12        | 0.407                |
| Pig-tailed macaque, <i>Macaca nemestrina</i>               | 0.63   | 1.93 | 20.33 | 12.00 | <b>0.14</b> | <b>0.004 (T)</b> | <b>0.46</b> | <b>&lt;0.001 (T)</b> |
| Asian elephant, <i>Elephas maximus</i>                     |        |      |       | 0.08  |             |                  |             |                      |
| Black flying squirrel, <i>Aeromys tephromelas</i>          | 0.15   | 0.19 |       |       | 0.01        | 0.726            | 0.15        | 0.255                |
| Thomas' flying squirrel*, <i>Aeromys thomasi</i> *         | 0.81   | 0.03 |       |       | <b>0.20</b> | <b>0.001 (C)</b> | 0.18        | 0.104                |
| Ear-spot squirrel*, <i>Callosciurus adamsi</i> *           |        | 0.42 |       |       | 0.03        | 0.295            | 0.13        | 0.250                |
| Prevost's squirrel, <i>Callosciurus prevostii</i>          | 1.39   | 4.91 |       |       | <b>0.08</b> | <b>0.035 (C)</b> | <b>0.32</b> | <b>&lt;0.001 (C)</b> |
| Large mystery squirrel, <i>Callosciurus sp.?</i>           |        | 0.03 |       |       |             |                  |             |                      |
| Bornean pygmy squirrel*, <i>Exilisciurus exilis</i> *      | (0.01) |      |       |       |             |                  |             |                      |
| Horsfield's flying squirrel, <i>Iomys horsfieldi</i>       |        | 0.03 |       |       |             |                  |             |                      |
| Red giant flying squirrel, <i>Petaurista petaurista</i>    | 0.53   |      |       |       | <b>0.08</b> | <b>0.033 (C)</b> | 0.21        | 0.126                |
| Temminck's flying squirrel, <i>Petinomys setosus</i>       | (0.01) |      |       |       |             |                  |             |                      |
| Smoky flying squirrel, <i>Pteromyscus pulverulentus</i>    | 0.02   |      |       |       |             |                  |             |                      |
| Giant squirrel, <i>Ratufa affinis</i>                      | 0.38   | 0.90 |       |       | 0.03        | 0.238            | <b>0.20</b> | <b>0.001 (C)</b>     |
| Tufted ground squirrel*, <i>Rheithrosciurus macrotis</i> * | 0.02   |      | 1.08  | 0.34  | <b>0.11</b> | <b>0.017 (T)</b> | <b>0.35</b> | <b>&lt;0.001 (T)</b> |
| Brooke's squirrel*, <i>Sundasciurus brookei</i> *          | 0.08   | 0.13 |       |       | 0.04        | 0.161            | 0.15        | 0.498                |
| Low's squirrel, <i>Sundasciurus lowii</i>                  |        | 0.03 | 0.03  |       |             |                  |             |                      |
| Horse-tailed squirrel, <i>Sundasciurus hippurus</i>        | (0.04) | 0.13 | 0.05  | 0.19  | 0.01        | 0.990            | 0.02        | 1.000                |
| Long-tailed giant rat, <i>Leopoldamys sabanus</i>          |        |      | 0.53  |       | 0.03        | 0.316            | 0.20        | 0.080                |
| Brown spiny rat, <i>Maxomys rajah</i>                      |        |      | 0.88  |       | 0.03        | 0.266            | <b>0.21</b> | <b>0.034 (T)</b>     |
| Red spiny rat, <i>Maxomys surifer</i>                      |        |      |       | 0.15  | 0.02        | 0.555            | 0.17        | 0.1895               |
| Whitehead's rat, <i>Maxomys whiteheadi</i>                 |        |      | 0.08  |       |             |                  |             |                      |

Supplementary Material

|                                                         |      |      |      |             |                  |             |                      |
|---------------------------------------------------------|------|------|------|-------------|------------------|-------------|----------------------|
| Malay porcupine, <i>Hystrix brachyura</i>               |      | 2.33 | 2.89 | <b>0.08</b> | <b>0.049 (T)</b> | <b>0.31</b> | <b>&lt;0.001 (T)</b> |
| Thick-spined porcupine*, <i>Thecurus crassispinis</i> * |      | 3.70 | 0.64 | 0.03        | 0.306            | <b>0.21</b> | <b>&lt;0.001 (T)</b> |
| Long-tailed porcupine, <i>Trichys fasciculata</i>       |      | 1.05 | 0.38 | 0.06        | 0.109            | <b>0.25</b> | <b>0.002 (T)</b>     |
| Pentail treeshrew, <i>Ptilocercus lowii</i>             | 0.06 |      |      | 0.04        | 0.183            | 0.15        | 0.504                |
| Plain treeshrew*, <i>Tupaia longipes</i> *              | 0.02 |      | 0.08 |             |                  |             |                      |
| Large treeshrew, <i>Tupaia tana</i>                     |      |      | 0.08 |             |                  |             |                      |
| Lesser treeshrew, <i>Tupaia minor</i>                   |      |      | 0.05 |             |                  |             |                      |

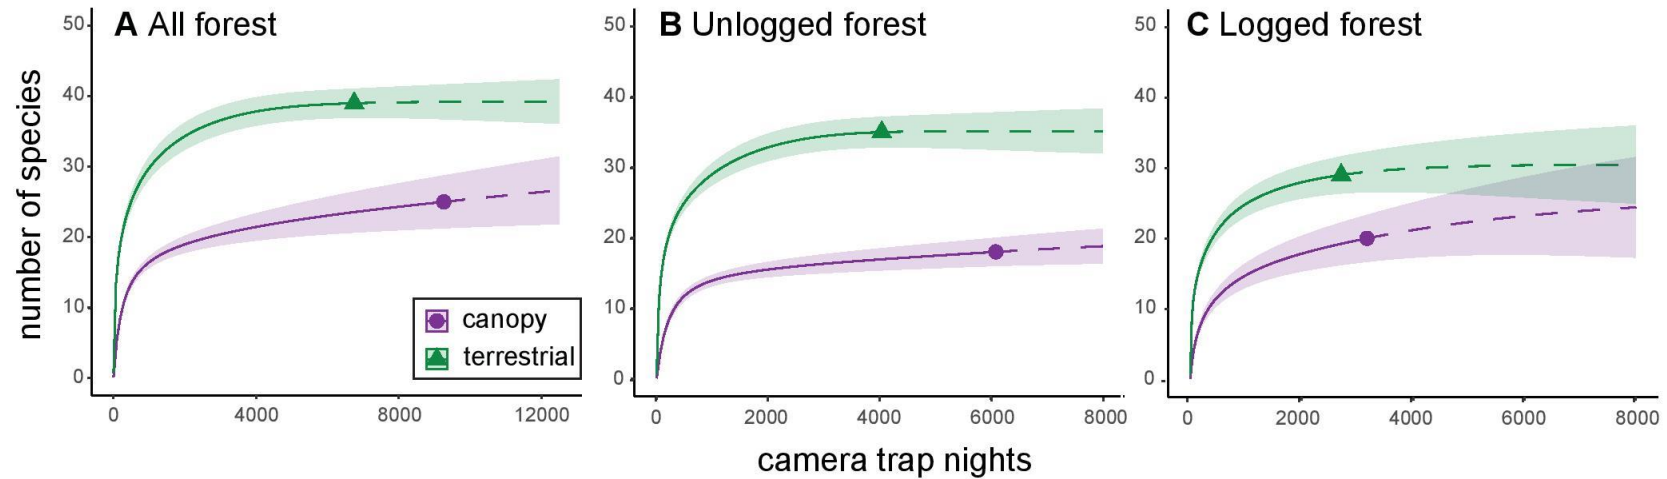

**Figure S1 (A-C). Rarefied species accumulation curves for arboreal and terrestrial mammal communities in (A) both forest types combined, (B) unlogged forest only, and (C) logged forest only. Curves were extrapolated (dashed line) to approximately double the minimum observed sample size in each comparison. Confidence intervals were set at 95% and are represented by shaded areas around the curves.**

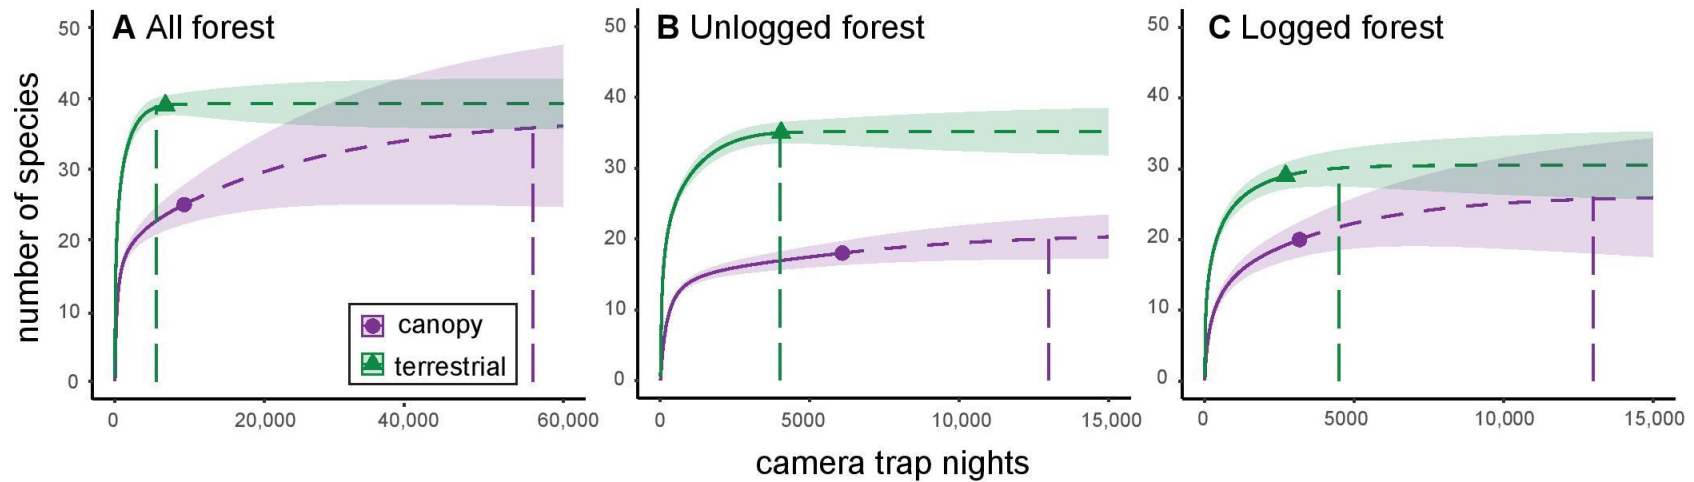

**Figure S2 (A-C).** Rarefied species accumulation curves for arboreal and terrestrial mammal communities in (A) both forest types combined, (B) unlogged forest only, and (C) logged forest only. Curves were extrapolated (dashed line) to the point of asymptote for arboreal communities. Approximate sampling effort required to reach asymptote is marked by vertical dashed lines. Confidence intervals were set at 84% and are represented by shaded areas around the curves

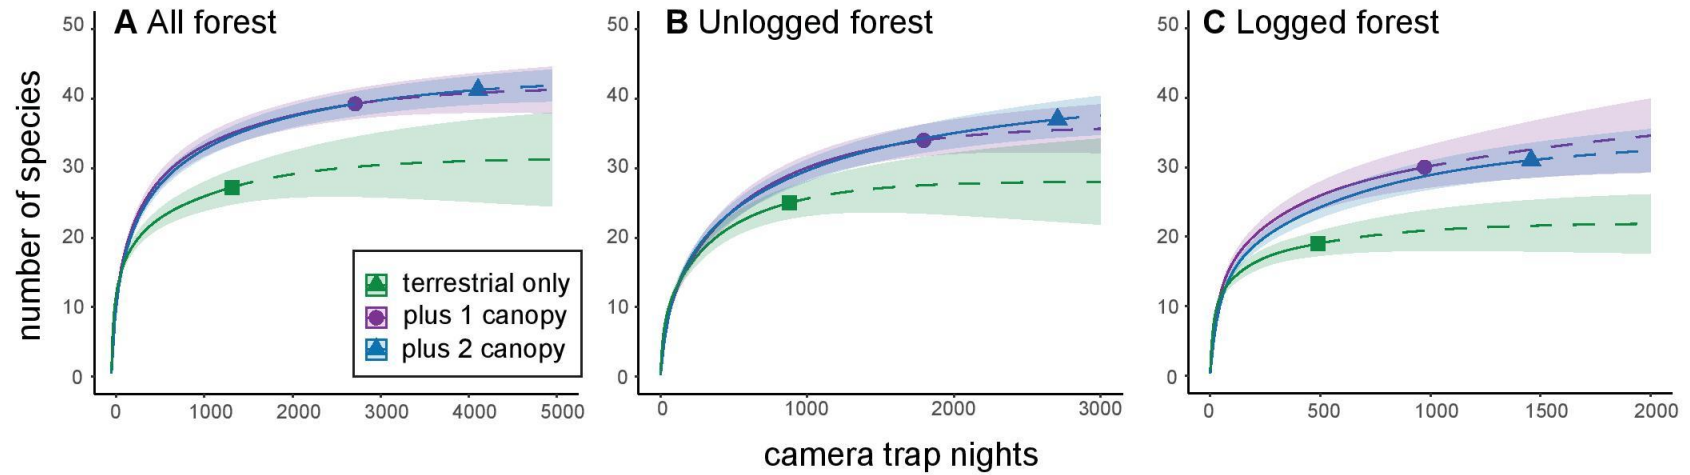

**Figure S3 (A-C).** Control species accumulation curves for (A) both forest types combined, (B) unlogged forest and (C) logged forest, comparing overall species numbers obtained from a subset of 1,409 CTN each for: terrestrial-only camera-traps, terrestrial camera-traps plus single canopy camera-traps, and terrestrial camera-traps, single canopy camera-traps plus the 19 experimental second canopy camera-traps. Confidence intervals were set at 84% and are represented by shaded areas around the curves.



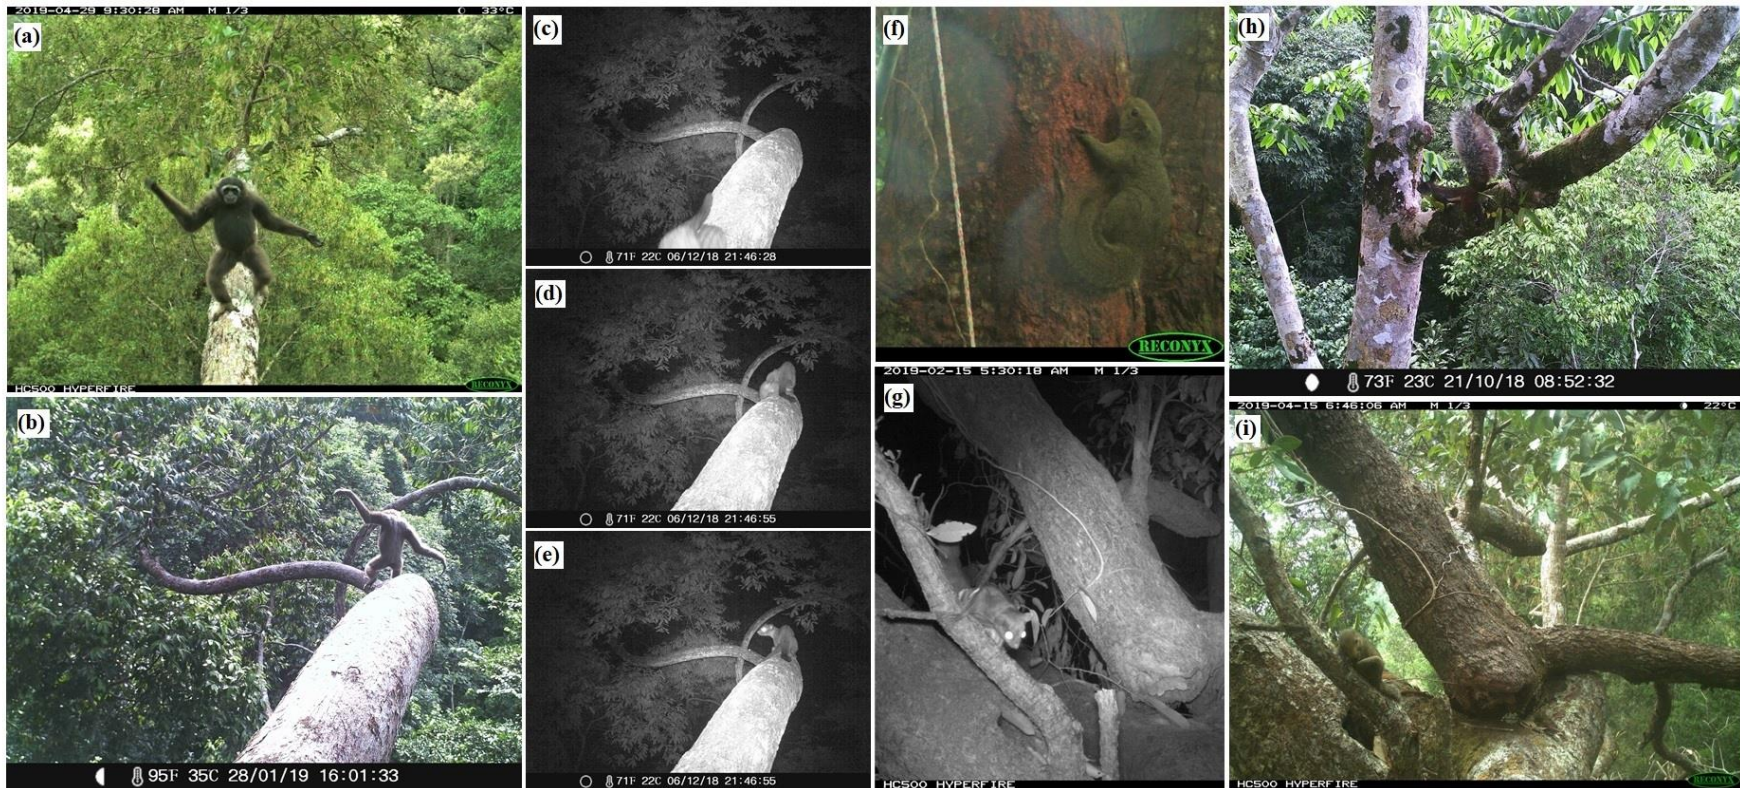

**Figure S4.** Examples of new insights from canopy camera-traps. (a), (b) branch-walking locomotion in Bornean gibbon *Hylobates funereus*; (c)-(e) likely mating event of the strictly arboreal small-toothed palm civet *Arctogalidia trivirgata* at 33.6 m height; (f) arboreal squirrel not fitting any known description for Bornean species (image cropped for clarity); (g) putative record of smoky flying squirrel *Pteromyscus pulverulentus*, for which no confirmed photographic image currently exists (Thorington et al. 2012, IUCN Red List accessed February 2021); (h) likely scent-marking behaviour in tufted ground squirrel *Rheithrosciurus macrotis*, a rarely-seen Borneo endemic thought to be largely terrestrial; (i) use of the canopy strata (camera-trap at 22 m height) by plain treeshrew *Tupaia longipes*, a species previously considered strictly terrestrial (Payne & Francis 2007).

## Supplementary Material Reference List

- Azcarraga, A. A., Tessaro, S. G., & Delfin-Alfonso, C. A. Activity patterns of arboreal mammals in a tropical rain forest in México. *THERYA* (2020) 11(2), 225
- Aziz, S. A., Clements, G. R., McConkey, K. R., Sritongchuay, T., Pathil, S., Yazid, M. N. H. A., Campos-Arceiz, A., Forget, P.-M., & Bumrungsri, S. Pollination by the locally endangered island flying fox (*Pteropus hypomelanus*) enhances fruit production of the economically important durian (*Durio zibethinus*). *Ecology and Evolution* (2017) 7(21), 8670–8684. <https://doi.org/10.1002/ece3.3213>
- Balbuena, D., Alonso, A., Panta, M., Garcia, A., & Gregory, T. Mitigating Tropical Forest Fragmentation with Natural and Semi-Artificial Canopy Bridges. *Diversity* (2019) 11(4), 66. <https://doi.org/10.3390/d11040066>
- Biot, H., Campera, M., Imron, M. A., & Nekaris, K. A. I. Artificial canopy bridges improve connectivity in fragmented landscapes: The case of Javan slow lorises in an agroforest environment. *American Journal of Primatology* (2020) 82(4), e23076.
- Boulerice, J. T., & Van Fleet, L. A. A novel technique for detecting northern flying squirrels. *Wildlife Society Bulletin* (2016) 40(4), 786–791. <https://doi.org/10.1002/wsb.701>
- Bowler, M. T., Tobler, M. W., Endress, B. A., Gilmore, M. P., & Anderson, M. J. Estimating mammalian species richness and occupancy in tropical forest canopies with arboreal camera traps. *Remote Sensing in Ecology and Conservation* (2017), 3(3), 146–157. <https://doi.org/10.1002/rse2.35>
- Cassano, C. R., Barlow, J., & Pardini, R. Large mammals in an agroforestry mosaic in the Brazilian Atlantic Forest. *Biotropica* (2012) 44(6), 818–825. Doi:10.1111/j.1744.7429.2012.00870.x
- Chan, B.P.L., Lo, Y.F.P., Hong, X.-J., Mak, C.F. & Ma, Z. First use of artificial canopy bridge by the world's most critically endangered primate the Hainan gibbon *Nomascus hainanus*. *Scientific Reports* (2020) 10:15176. <https://doi.org/10.1038/s41598-020-72641-z>
- Clayton, E. 2016. *Pteromyscus pulverulentus*. The IUCN Red List of Threatened Species 2016: e.T18703A22245307. <https://dx.doi.org/10.2305/IUCN.UK.2016-2.RLTS.T18703A22245307.en>. Downloaded on 16 February 2021
- Cotsell, N., & Vernes, K. Camera traps in the canopy: Surveying wildlife at tree hollow entrances. *Pacific Conservation Biology* (2016) 22(1), 48–60

- Dalloz, M.F., Loretto, D., Papi, B., Cobra, P. & Vieira, M.V. Positional behaviour and tail use by the bare-tailed woolly opossum *Caluromys philander* (Didelphimorphia, Didelphidae). *Mammalian Biology* (2012), 77: 307-313
- Debrulle, A., Kayser, P., Veron, G., Vergniol, M., & Perrigon, M. Improving the detection rate of binturongs (*Arctictis binturong*) in Palawan Island, Philippines, through the use of arboreal camera-trapping. *Mammalia* (2020) 84(6), 563-567. <https://doi.org/10.1515/mammalia-2019-0113>
- Fang, Y.-H., Li, Y.-P., Ren, G.-P., Huang, Z.-P., Cui, L.-W., Zhang, L.-X. et al. The effective use of camera traps to document the northernmost distribution of the western black crested gibbon in China. *Primates* (2020) 61(2), 151–158. <https://doi.org/10.1007/s10329-019-00774-5>
- Fang, Y., Ren, G., Gao, Y., Zhang, S., Wang, H., Yanpeng, L. et al. Impact of ground and canopy camera-trapping installation on wildlife monitoring. *Biodiversity Science* (2018), 26(7), 717. <https://doi.org/10.17520/biods.2018035>
- Fonturbel, F.E., Candia, A.B. & Botto-Mahan, C. Nocturnal activity patterns of the monito del monte (*Dromiciops gliroides*) in native and exotic habitats. *Journal of Mammalogy* (2014), 95(6): 1199-1206
- Forsman, E. D., & Swingle, J. K. Use of arboreal nests of tree voles (*Arborimus spp.*) by amphibians. *Herpetological Conservation and Biology* (2007) 2(2), 113–118.
- Goldingay, R.L. & Taylor, B.D. Targeted field testing of wildlife road-crossing structures: koalas and canopy rope-bridges. *Australian Mammalogy* (2016) 39, 100-104 <https://doi.org/10.1071/AM16014>
- Goldingay, R. L., Rohweder, D., & Taylor, B. D. Will arboreal mammals use rope-bridges across a highway in eastern Australia? *Australian Mammalogy* (2013), 35(1), 30–38. <https://doi.org/10.1071/AM12006>
- Goosem, M., Weston, N., & Bushnell, S. Effectiveness of rope bridge arboreal overpasses and faunal underpasses in providing connectivity for rainforest fauna. UC Davis: Road Ecology Center (2005) <https://escholarship.org/uc/item/8br4h1kb>
- Godoy-Guinao, J., I. A. Diaz, and J. L. Celis-Diez. Confirmation of arboreal habits in *Dromiciops gliroides*: A key role in Chilean Temperate Rainforests. *Ecosphere* (2018) 9(10):e02424. Doi: 10.1002/ecs2.2424



- Gregory, T., Carrasco-Rueda, F., Alonso, A., Kolowski, J., & Deichmann, J. L. Natural canopy bridges effectively mitigate tropical forest fragmentation for arboreal mammals. *Scientific Reports* (2017) 7(1), 1–11. <https://doi.org/10.1038/s41598-017-04112-x>
- Gregory, T., Lunde, D., Zamora-Meza, H. T., & Carrasco-Rueda, F. Records of *Coendou ichillus* (Rodentia, Erethizontidae) from the lower urubamba region of Peru. *ZooKeys* (2015) 509, 109
- Gregory, T., Carrasco Rueda, F., Deichmann, J., Kolowski, J., & Alonso, A. Arboreal camera trapping: Taking a proven method to new heights. *Methods in Ecology and Evolution* (2014) 5(5), 443–451. <https://doi.org/10.1111/2041-210X.12177>
- Harley, D. K., Holland, G. J., Hradsky, B. A. K., & Antrobus, J. S. The use of camera traps to detect arboreal mammals: Lessons from targeted surveys for the cryptic Leadbeater's Possum *Gymnobelideus leadbeateri*. *Camera Trapping: Wildlife Management and Research* (2014) 233–243
- Hirakawa, H. Luring bats to the camera – A new technique for bat surveys. *Mammal Study* (2005) 30, 69-71
- Hongo, S., Dzefack, Z.C.B., Vernyuy, L.N., Sosuke, M., Nakashima, Y., Djieto-Lordon, C. & Yasuoka, H. Use of multi-layer camera trapping to inventory mammals in rainforests in southeast Cameroon. *African Study Monographs* (2020) Suppl. 60, 21-37
- International Union for Conservation of Nature (2021). Red List. <https://www.iucnredlist.org> [Accessed February 16 2021]
- Jayasekara, P., Weerasinghe, U.R, Wijesundara, S. & Takatsuki, S. Identifying diurnal and nocturnal frugivores in the terrestrial and arboreal layers of a tropical rain forest in Sri Lanka. *Ecotropica* (2007) 13: 7–15
- Kaizer, M. (2019). Non-invasive monitoring for population assessments of a critically endangered Neotropical primate. [PhD thesis]. [Salford, Manchester (UK)]: University of Salford
- Kierulff, M. C. M., Canale, G., Guidorizzi, C. E., & Cassano, C. The use of camera-traps in a survey of the Buff-headed capuchin monkey, *Cebus xanthosternos*. *Neotropical Primates* (2004), 12(2), 56-59.
- Lama, S.T. (2018). Assessing mammal diversity, distribution, and abundance: piloting arboreal camera trapping as a tool for monitoring endangered red panda in temperate forest of eastern Nepal. [Masters thesis]. [Lincoln (New Zealand)]: University of Lincoln
- Laughlin, M. M., Martin, J. G., Olson, E. R., College, N., & Avenue, E. Arboreal camera trapping reveals seasonal behaviors of *Peromyscus* spp. in *Pinus strobus* canopies. *American Midland Naturalist* (2020) 183:210–222

- Loría, L. I., & Méndez-Carvajal, P. G. Uso de hábitat y patrón de actividad del mono cariblanco (*Cebus imitator*) en un agroecosistema cafetalero en la provincia de Chiriquí, Panamá. *Tecnociencia* (2017) 19(1), 61–78
- Linden, B., Foord, S., Horta-Lacueva, Q. J. B., & Taylor, P. J. Bridging the gap: How to design canopy bridges for arboreal guenons to mitigate road collisions. *Biological Conservation* (2020) 246, 108560. <https://doi.org/10.1016/j.biocon.2020.108560>
- Linnell, M. A., & Lesmeister, D. B. Predator-prey interactions in the canopy. *Ecology and Evolution* (2020) 10, 8610–8622. <https://doi.org/10.1002/ece3.6518>
- Malt, J., & Lank, D. (2007). Temporal dynamics of edge effects on nest predation risk for the marbled murrelet. *Biological Conservation* (2007) 140(1), 160–173. <https://doi.org/10.1016/j.biocon.2007.08.011>
- McComb, L. B., Lentini, P. E., Harley, D. K. P., Lumsden, L. F., Antrobus, J. S., Eyre, A. C., et al. Feral cat predation on Leadbeater's possum (*Gymnobelideus leadbeateri*) and observations of arboreal hunting at nest boxes. *Australian Mammalogy* (2019) 41(2), 262–265. <https://doi.org/10.1071/AM18010>
- Mella, V. S. A., McArthur, C., Frend, R., & Crowther, M. S. Foxes in trees: A threat for Australian arboreal fauna? *Australian Mammalogy* (2018) 40(1), 103–105. <https://doi.org/10.1071/AM16049>
- Méndez-Carvajal, P. G. The Orion Camera System, a new method for deploying camera traps in tree canopy to study arboreal primates and other mammals: A case study in Panama. *Mesoamericana* (2014), 18(1), 9–23
- Mills, C. A., Godley, B. J., & Hodgson, D. J. Take only photographs, leave only footprints: Novel applications of non-invasive survey methods for rapid detection of small, arboreal mammals. *PLoS ONE* (2016) 11(1), e0146142. <https://doi.org/10.1371/journal.pone.0146142>
- Moore, J. F., & Niyigaba, P. First records of the Central African oyan (*Poiana richardsonii*) in Rwanda. *African Journal of Ecology* (2018) 56(4), 828–830. <https://doi.org/10.1111/aje.12576>
- Moore, J. F., Pine, W. E., Mulindahabi, F., Niyigaba, P., Gatorano, G., Masozera, M.K. et al. Comparison of species richness and detection between line transects, ground camera traps, and arboreal camera traps. *Animal Conservation* (2020) (23) 561-572. <https://doi.org/10.1111/acv.12569>
- Nekaris, K. A. I., Handby, V., Campera, M., Birot, H., Hedger, K., Eaton, J., et al. Implementing and Monitoring the Use of Artificial Canopy Bridges by Mammals and Birds in an Indonesian Agroforestry Environment. *Diversity* (2020) 12(10), 399

Oliveira-Santos, L. G. R., Tortato, M. A., & Graipel, M. E. Activity Pattern of Atlantic Forest Small Arboreal Mammals as Revealed by Camera Traps. *Journal of Tropical Ecology* (2008), 24(5), 563–567

Olson, E. R., Marsh, R. A., Bovard, B. N., Randrianarimanana, H. L. L., Ravaloharimanitra, M., Ratsimbazafy, J. H. et al. Arboreal camera trapping for the Critically Endangered greater bamboo lemur *Prolemur simus*. *Oryx* (2012) 46(04), 593–597.  
<https://doi.org/10.1017/S0030605312000488>

Otani, T. Measuring fig foraging frequency of the Yakushima macaque by using automatic cameras. *Ecological Research* (2001), 16(1), 49–54. <https://doi.org/10.1046/j.1440-1703.2001.00370.x>

Payne, J. & Francis, C. M. *Field Guide to the Mammals of Borneo*. Kota Kinabalu: The Sabah Society (2007). 332 p.

Ribeiro-Silva, L., Perrella, D. F., Biagolini-Jr, C. H., Zima, P. V. Q., Piratelli, A. J., Schlindwein, M. N., et al. Testing camera traps as a potential tool for detecting nest predation of birds in a tropical rainforest environment. *Zoologia (Curitiba)* (2018), 35.  
<https://doi.org/10.3897/zoologia.35.e14678>

Rivas-Romero, J.A. & Soto-Shoender, J.R. Filling in the gaps: Evaluating the use of camera traps in the canopy to examine frugivore visits to *Oreopanax echinops* in the highlands of Guatemala. *The Southwestern Naturalist* (2015) 60(4), 366–370. <http://dx.doi.org/10.1894/0038-4909-60.4.366>

Schipper, J. Camera-trap avoidance by Kinkajous *Potos flavus*: Rethinking the “non-invasive” paradigm. *Small Carnivore Conservation* (2007) 36, 38–41. <https://doi.org/10.1105/tpc.13.7.1567>

Soanes, K., Lobo, M. C., Vesk, P. A., McCarthy, M. A., Moore, J. L., & van der Ree, R. Movement re-established but not restored: Inferring the effectiveness of road-crossing mitigation for a gliding mammal by monitoring use. *Biological Conservation* (2013), 159, 434–441.  
<https://doi.org/10.1016/j.biocon.2012.10.016>

Soanes, K., Vesk, P. A., & van der Ree, R. Monitoring the use of road-crossing structures by arboreal marsupials: Insights gained from motion-triggered cameras and passive integrated transponder (PIT) tags. *Wildlife Research* (2015) 42(3), 241–256.  
<https://doi.org/10.1071/WR14067>

Suzuki, K. K., & Ando, M. Seasonal changes in activity patterns of Japanese flying squirrel *Pteromys momonga*. *Behavioural Processes* (2017) 143, 13–16.

- Suzuki, K. K., & Ando, M. Early and efficient detection of an endangered flying squirrel by arboreal camera trapping. *Mammalia* (2019) 83(4), 372–378.
- Suzuki, K. K., Shimamoto, T., Furukawa, R. G., & Yanagawa, H. Diurnal activity of juvenile Russian flying squirrels recorded by camera trapping. *Lutra* (2016) 59, 115–120
- Tan, C. L., Yang, Y., & Niu, K. Into the night: Camera traps reveal nocturnal activity in a presumptive diurnal primate, *Rhinopithecus brelichi*. *Primates* (2013) 54(1), 1–6 <https://doi.org/10.1007/s10329-012-0318-2>
- Teixeira, F. Z., Printes, R. C., Fagundes, J. C. G., Alonso, A. C., & Kindel, A. Canopy bridges as road overpasses for wildlife in urban fragmented landscapes. *Biota Neotropica* (2013) 13(1), 117–123. <https://doi.org/10.1590/S1676-06032013000100013>
- Thorington, R.W. Jr., Koprowski, J.L., Steele, M.A. & Whatton, J.F. *Squirrels of the World*. Baltimore: The Johns Hopkins University Press (2012). 459 p.
- Tongkok, S., He, X., Alcantara, M.J.M., Saralamba, C., Nathalang, A., Chanthorn, W. et al. Composition of frugivores of *Baccaurea ramiflora* (Phyllanthaceae) and effects of environmental factors on frugivory in two tropical forests of China and Thailand. *Global Ecology and Conservation* (2020) 23, e010196. <https://doi.org/10.1016/j.gecco.2020.e01096>
- Van Berkel T.B.T., Rogers, L.D., Kilburn, H.J, Munir, M., Mortiboys, D.M. and Goodchild, R., (2012). A preliminary biodiversity survey of a lowland rainforest in Bukit Batikap Protection Forest, Central Kalimantan, Indonesian Borneo. Murung Raya Expedition 2010-2011 Scientific Report. Heart of Borneo Project
- Wahyudi, D., & Stuebing, R. (2013). Camera trapping as a conservation tool in a mixed-use landscape in East Kalimantan. *Indonesian Natural History* (2013) 1(2), 37–46
- Weston, N., Goosem, M., Marsh, H., Cohen, M., & Wilson, R. Using canopy bridges to link habitat for arboreal mammals: Successful trials in the Wet Tropics of Queensland. *Australian Mammalogy* (2011) 33(1), 93–105. <https://doi.org/10.1071/AM11003>
- Whitworth, A., Braunholtz, L. D., Huarcaya, R. P., Macleod, R., & Beirne, C. Out on a limb: Arboreal camera traps as an emerging methodology for inventorying elusive rainforest mammals. *Tropical Conservation Science* (2016) 9(2), 675–698. <https://doi.org/10.1177/194008291600900208>

Whitworth, A., Beirne, C., Huarcaya, R. P., Whittaker, L., Rojas, S.J.S., Tobler, M. W. et al. Human disturbance impacts on rainforest mammals are most notable in the canopy, especially for larger-bodied species. *Diversity and Distributions* (2019a) 25: 1166–1178. <https://doi.org/10.1111/ddi.12930>

Whitworth, A., Whittaker, L., Huarcaya, R. P., Flatt, E., Morales, M. L., Connor, D. et al. Spider monkeys rule the roost: Ateline sleeping sites influence rainforest heterogeneity. *Animals* (2019b). 1052. Doi: 10.3390/ani9121052

Yang, Y., Tian, Y.-P., He, C.-X., Huang, Z., Dong, S.-H., Wang, B., et al. The Critically Endangered Myanmar snub-nosed monkey *Rhinopithecus strykeri* found in the Salween River Basin, China. *Oryx* (2018) 52(1), 134–136. <https://doi.org/10.1017/S0030605316000934>

Yokochi, K., & Bencini, R. A remarkably quick habituation and high use of a rope bridge by an endangered marsupial, the western ringtail possum. *Nature Conservation* (2015) 11, 79–94. <https://doi.org/10.3897/natureconservation.11.4385>
